# Supplementary material for: Physical Activity Following Hip Arthroscopy in Young and Middle-Aged Adults: A Systematic Review
Source: Sports Med Open. 2020 Jan 28;6:7. doi: 10.1186/s40798-020-0234-8 (PMC6987281; doi:10.1186/s40798-020-0234-8)
Supplement: Supplementary file 7 — Additional file 7: Inclusion criteria, exclusion criteria, arthroscopic findings and interventions. [file 40798_2020_234_MOESM7_ESM.xlsx]

## Sheet: Sheet1
Additional File 7: Inclusion criteria, Exclusion criteria, arthroscopic findings and interventions
Column1	Column2	Column3	Column4	Column5	Column6	Column7	Column8	Column9	Column10
Author	Title	Inclusion criteria	Exclusion criteria	Reported arthroscopic findings	Arthroscopic intervention
					Chondral	Labral	FAI	Capsular	Other
Barastegui et al. (2018)	Assessing long‑term return to play after hip arthroscopy in football players evaluating risk factors for good prognosis	Professional football players competing at national level CAM FAI	Hip dysplasia, Non-active football players Patients who declined to be included in the study	NR	NR	Labral Repair Partial labrectomy	Femoral osteoplasty	NR	NR
Basques et al (2019)	Preoperative Symptom Duration Is Associated With Outcomes After Hip Arthroscopy	FAIS	Revision surgeries, Congenital hip conditions, Prior surgical intervention, Primary complaints of instability, Concomitant periacetabular osteotomy, and iliopsoas release or lengthening	Femoral head lesions	Microfracture	Repair Debridement	Femoral osteochondroplasty Acetabular rim trim	Plication	Trochanteric bursectomy
Bayley et al. (2017)	Hip arthroscopy in patients less than 25 years of age in the treatment of labral tears: aetiology and clinical outcomes	≤25 years old. Labral tear	Problems other than primary labral-chondral pathology	Labral tear FAI	Osteochondroplasty	Repair Debridement	NR	NR	NR
Beck et al (2019)	Is there a correlation between outcomes after hip arthroscopy for femoroacetabular impingement syndrome and patient cortical bone thickness?	FAIS primary hip arthroscopy	Advanced hip osteoarthritis ( Tönnis Grade >2), hip dysplasia (lateral center edge angle <20° patients undergoing revision hip arthroscopy, ASA level >2, History of previous hip surgery bilaterally, History of spine surgery Concomitant hip procedures (e.g. bursitis, gluteus tear repair etc.) during the time of arthroscopy.	NR	NR	NR	NR	NR	NR
Beck et al (2019)	Patients With Borderline Hip Dysplasia Achieve Clinically Significant Outcome After Arthroscopic Femoroacetabular Impingement Surgery: A Case-Control Study With Minimum 2-Year Follow-up	Clinical and radiographic diagnosis of symptomatic FAIS, Failure of nonoperative treatment Minimum 2-year follow-up.	History of ipsilateral or contralateral hip surgery, Advanced osteoarthritis, reduced joint space ( Tönnis grade 1), Evidence or history of congenital hip disorders (slipped capital femoral epiphysis and Perthes disease), Hip arthroscopy for an indication other than FAIS, Patients without 2-year outcomes.	NR	NR	Repair	Femoral osteoplasty Acetabular rim trim	Plication	NR
Bennell et al 2017	Efficacy of adding a physiotherapy rehabilitation programme to arthroscopic management of femoroacetabular impingement syndrome: a randomised controlled trial (FAIR)	Aged ≥16 years FAI syndrome (diagnosed by an orthopaedic surgeon based on clinical/ imaging findings) Hip/groin symptoms for ≥3 months Scheduled for hip arthroscopy	Radiographic evidence of hip osteoarthritis more than mild in severity defined as Tönnis >grade 1; Professional athlete; Other concurrent injury/ condition affecting ability to undertake rehabilitation; Unable to attend a study physiotherapist if randomised to the PT group; Unwilling to refrain from formalised PT rehabilitation; Unable to understand English.	Pincer deformity Cam deformity Combined Cam/pincer Labral disorder Ligamentum teres pathology Synovitis Acetabular rim lesion	Microfracture	Repair	Femoral ostectomy Acetabular ostectomy		Lig teres debridement
Bennett et al. (2016)	Prospective 12-month functional and vocational outcomes of hip arthroscopy for femoroacetabular impingement as part of an evidence-based hip pain rehabilitation pathway in an active military population	Imaging diagnosis of FAI Failed conservative treatment	Not reported	NR	NR	NR	NR
Bolia et al (2019)	Midterm Outcomes Following Repair of Capsulotomy Versus Nonrepair in Patients Undergoing Hip Arthroscopy for Femoroacetabular Impingement With Labral Repair	>18 years old Hip arthroscopy with correction of cam impingement or pincer impingement Labral repair.	Age < 18 years of age, Previous hip procedures, History of Legg-Calve-Perthes disease, slipped capital femoral epiphysis, avascular necrosis of the femoral head; inflammatory hip disorder, Lateral center-edge angle < 25° Hip joint space of <2 mm on AP x-ray, Microfracture or labral reconstruction performed at arthroscopy. Beighton score > 4 points	NR	NR	Repair	Femoral osteoplasty	NR	Lig teres debridement
	Group 2			NR	NR	Repair	Femoral osteoplasty	Repair	Lig teres debridement
Cancienne et al (2019)	Influence of Cigarette Smoking at the Time of Surgery on Postoperative Outcomes in Patients With Femoroacetabular Impingement: A Matched-Pair Cohort Analysis	FAI Failure of nonoperative therapies Documented smoking status Minimum 2-year clinical follow-up data	Revision or bilateral surgery Dysplasia.	Pincer deformity Cam deformity Articular cartilage damage Capsular adhesions	Chondroplasty	Repair	Femoral osteoplasty Acetabular rim trim	Plication	Trochanteric bursectomy Synovectomy
Chahal et al (2015)	The Patient Acceptable Symptomatic State for the Modified Harris Hip Score and Hip Outcome Score Among Patients Undergoing Surgical Treatment for Femoroacetabular Impingement	Surgery between 2012 and 2014 >16 years old Diagnosis of FAI Failure of non-operative treatment for a minimum of 3 months Underwent definitive treatment with hip arthroscopy, labral surgery, as well as acetabular rim trimming and/or femoral osteochondroplasty.	Radiographic arthritis of the hip Patients who did not provide informed consent	Pincer deformity Cam deformity Combined pincer/cam Articular cartilage damage Labral tear	Microfracture Chondroplasty	Repair Debridement	Femoral osteoplasty Acetabular rim trim	NR	Synovectomy Psoas release Trochanteric bursectomy Iliotibial band lengthening
Chaharbakhshi et al (2017)	Do Ligamentum Teres Tears Portend Inferior Outcomes in Patients With Borderline Dysplasia Undergoing Hip Arthroscopic Surgery?	Preoperative diagnosis of borderline dysplasia (lateral center-edge angle, 18- 25°); Arthroscopic labral treatment with capsular plication; Preoperatively collected modified Harris Hip Score (mHHS), Non-Arthritic Hip Score (NAHS), Hip Outcome Score–Sport-Specific Subscale (HOS-SSS), and visual analogue scale (VAS) for pain	Preoperative osteoarthritis (Tönnis grade .>0), Workers’ compensation claims, Previous ipsilateral hip surgery, Previous hip conditions (avascular necrosis, slipped capital femoral epiphysis, Legg-Calve´ Perthes disease), Severe dysplasia (LCEA ≤18°).	Articular cartilage damage Labral tear Ligamentum teres tear	Microfracture	Repair Debridement	Femoral osteoplasty	NR	Lig teres debridement Loose body removal Iliopsoas fractional lengthening Acetabular decortication
Group 2				Articular cartilage damage Labral tear	Microfracture	Repair Debridement	Femoral osteoplasty	NR	Iliopsoas fractional lengthening Acetabular decortication Synovectomy Notchplasty
Chaharbakhshi (2019)	Is Hip Arthroscopy Effective in Patients With Combined Excessive Femoral Anteversion and Borderline Dysplasia? A Match-Controlled Study	Excessive femoral anteversion Arthroscopic labral treatment, Capsular closure Preoperative patient-reported outcome scores	Workers’ compensation claims Preoperative Tönnis osteoarthritis grade >1, Avascular necrosis, Trochanteric bursectomy, Gluteus medius repair, Microfracture, Frank dysplasia	Articular cartilage damage Labral tear Ligamentum teres tear	NR	Repair Debridement	Femoral osteoplasty Acetabular osteoplasty	Plication	Lig teres debridement Iliopsoas fractional lengthening Notchplasty
	Group 2			Articular cartilage damage Labral tear Ligamentum teres tear	NR	Repair Reconstruction Debridement	Femoral osteoplasty Acetabular osteoplasty	Plication	Lig teres debridement Lig teres repair Synovectomy Iliopsoas fractional lengthening Notchplasty
Chahla (2019)	Is There an Association Between Preoperative Expectations and Patient-Reported Outcome After Hip Arthroscopy for Femoroacetabular Impingement Syndrome?	Clinical and radiographic diagnosis of symptomatic FAIS, Failure of conservative management Arthroscopy to address the FAIS with a minimum of 1year follow-up.	History of previous ipsilateral or contralateral hip surgery, Congenital hip pathologies (eg, developmental dysplasia of the hip and slipped capital femoral epiphysis), Undergoing concomitant periacetabular osteotomy, or other arthroscopic procedures.	NR	NR	Repair	Femoral osteoplasty	Repair	NR
Chahla (2019)	Influence of Acetabular Labral Tear Length on Outcomes After Hip Arthroscopy for Femoroacetabular Impingement Syndrome With Capsular Plication	FAIS Failed nonoperative management Underwent femoroplasty, acetabuloplasty, and labral repair.	Unwillingness to participate in the study, Symptomatic contralateral hip FAIS requiring surgery, Revision surgery, Ipsilateral knee and ankle injury/surgery, History of any hip surgery, History of pediatric deformities (developmental dysplasia of the hip [lateral center-edge angle <20°], slipped capital femoral epiphysis, and Perthes disease), Osteoarthritis or joint space narrowing ( Tönnis grad…	NR	NR	Repair	Femoral osteoplasty Acetabular rim trim	Closure	NR
	Group 2			NR	NR	Repair	Femoral osteoplasty Acetabular rim trim	Closure	NR
Chambers (2019)	Periportal Capsulotomy: Technique and Outcomes for a Limited Capsulotomy During Hip Arthroscopy	Appropriate symptoms and clinical signs for FAI Failure of conservative care Radiographic evidence of cam-, pincer-, or combined-type impingement; Treated surgically using the periportal capsulotomy technique without capsular closure.	Osteoarthritis ( Tönnis grade 2 or higher), Hypermobility (Beighton score 4 or higher), Bilateral surgery, revision surgery, or capsular closure	Pincer deformity Cam deformity Articular cartilage damage Labral tear	Microfracture Chondroplasty	Repair Debridement	Femoral osteoplasty Acetabular osteoplasty	No Closure	NR
Chandrasekaran et al. (2017)	Arthroscopic Reconstruction of Segmental Defects of the Hip Labrum: Results in 22 Patients With Mean 2-Year Follow-Up	Labral reconstruction with irreparable segmental defects of the labrum with exposed acetabular subchondral bone Mean 2-year follow-up.	Lateral center edge angle <18 and Tönnis grade arthritis17 > Outerbridge grade 3 or 4 changes of the acetabulum No reconstruction	Articular cartilage damage (acetabular and femoral head chondral lesions) Labral tear Ligamentum teres tear	Microfracture Chondroplasty	Reconstruction	Femoral & acetabular osteplasty	Release Repair	Lig teres treatment Iliopsoas release Iliopsoas bursectomy Trochanteric bursectomy Loose body removal Notchplasty
Chandrasekaran et al. (2017)	Arthroscopic Capsular Plication and Labral Seal Restoration in Borderline Hip Dysplasia: 2-Year Clinical Outcomes in 55 Cases	Surgery between April 2008 and April 2013. Hip arthroscopy for symptomatic intraarticular hip disorders refractory to nonoperative management <40 years old LCEA of 18 to 25°	Tönnis grade of 1 or greater Severe hip dysplasia (center-edge angle ≤17°) Legg-Calvé-Perthes	Articular cartilage damage Labral tear Ligamentum teres tear	Microfracture Chondroplasty	Repair Reconstruction Debridement	Osteoplasty	Plication	Lig teres debridement Iliopsoas release Trochanteric bursectomy Loose body removal
Chandrasekaran et al. (2016)	Outcomes of Hip Arthroscopic Surgery in Patients With Tönnis Grade 1 Osteoarthritis With a Minimum 2-Year Follow-up: Evaluation Using a Matched-Pair Analysis With a Control Group With Tönnis Grade 0	Primary hip arthroscopic surgery for symptomatic intra-articular hip disorders Tönnis grade reported Minimum follow-up 2 years	Previous hip conditions such as avascular necrosis, Legg-Calve´-Perthes disease, slipped capital femoral epiphysis, inflammatory arthritis, or hip fractures	Articular cartilage damage Labral tear Ligamentum teres tear	Microfracture Chondroplasty Subchondral cyst removal	Repair Reconstruction Debridement	Femoral osteoplasty Acetabular osteoplasty	Release Repair	Lig teres treatment Notchplasty Iliopsoas release Loose body removal
	Group 2			Articular cartilage damage Labral tear Ligamentum teres tear	Microfracture Chondroplasty Subchondral cyst removal	Repair Reconstruction Debridement	Femoral osteoplasty Acetabular osteoplasty	Release Repair	Lig teres treatment Notchplasty Iliopsoas release Loose body removal. subspine decompression
Chandrasekaran et al. (2017)	Correlation Between Changes in Visual Analog Scale and Patient-Reported Outcome Scores and Patient Satisfaction After Hip Arthroscopic Surgery	Not specifically reported	Revision surgery; Arthritis rated greater than Tönnis grade 1 Previous hip conditions such as inflammatory arthritis, avascular necrosis, slipped femoral capital epiphysis, or fractures	NR	Microfracture Chondroplasty Subchondral cyst removal	Repair Reconstruction Debridement	Femoral osteoplasty Acetabular osteoplasty	Release Repair Partial capsulotomy	Lig teres treatment Notchplasty Subspine decompression Ilopsoas relase Ilopsoas bursectomy Iliotibial band release Trochanteric bursectomy Gluteus medius/minimus repair Gluteus maximus transfer Piriformis release Sciatic neurolysis Removal of loose body Removal of heterotopic ossification
Chandrasekaran et al. (2015)	Preoperative delayed gadolinium-enhanced magnetic resonance imaging of cartilage (dGEMRIC) for patients undergoing hip arthroscopy: Indices are predictive of magnitude of improvement in two-year patient-reported outcomes	dGEMRIC scan pre-op 2 year follow-up	Previous hip surgery, Slipped capital femoral epiphysis, Inflammatory arthropathy, Legg-Calve-Perthes disease, Arthritis of >1 Tönnis grade	Articular cartilage damage Labral tear Ligamentum teres tear	NR	Repair Reconstruction Debridement	Femoral osteoplasty Acetabular osteoplasty	Release Repair	Lig teres debridement Notchplasty Synovectomy Loose body removal Excision of bone cyst Trochanteric bursectomy Gluteal repair Iliopsoas release
	Group 2			Articular cartilage damage Labral tear Ligamentum teres tear	Chondroplasty	Repair Reconstruction Debridement	Femoral osteoplasty Acetabular osteoplasty	Release Repair	Lig teres debridement Notchplasty Synovectomy Loose body removal Excision of bone cyst Trochanteric bursectomy Gluteal repair Iliopsoas release Removal os acetabuli ITB release
Chandrasekaran et al. (2017)	Minimum 2-Year Outcomes of Hip Arthroscopic Surgery in Patients With Acetabular Overcoverage and Profunda Acetabulae Compared With Matched Controls With Normal Acetabular Coverage	Symptomatic labral tears due to FAI	Previous hip conditions (such as fractures, Legg-Calve-Perthes disease, slipped capital femoral epiphysis, and avascular necrosis), Inflammatory arthritis, Previous hip surgery.	Articular cartilage damage Labral tear Ligamentum teres tear	Microfracture Chondroplasty	Repair Reconstruction Debridement	Femoral osteoplasty Acetabular osteoplasty	Release Repair	Lig teres treatment Iliopsoas release Removal of loose body
				Articular cartilage damage Labral tear Ligamentum teres tear	Microfracture Chondroplasty	Repair Reconstruction Debridement	Femoral osteoplasty Acetabular osteoplasty	Release Repair	Lig teres treatment Iliopsoas release Removal of loose body Trochanteric bursectomy
Chandrasekaran (2019)	Outcomes of Hip Arthroscopy in Patients With Previous Lumbar Spine Surgery: A Matched-Pair Controlled Comparative Study With Minimum Two-Year Follow-Up	Hip arthroscopy for symptomatic intra-articular hip disorders Prior history of lumbar spine surgery (either decompression or fusion).	Patients with Tönnis grade ≥2 radiologic arthritis, Previous hip conditions (e.g., inflammatory arthritis, slipped capital femoral epiphysis, Legg-Calve-Perthes disease, avascular necrosis, and fracture) Prior hip surgery.	Articular cartilage damage Labral tear Ligamentum teres tear	Microfracture Chondroplasty	Repair Reconstruction Debridement	Femoral osteoplasty Acetabular osteoplasty	Release Repair	Lig teres treatment Subchondral cyst removal Notchplasty Subspine decompression Iliopsoas release Trochanteric bursectomy Gluteus medius/minimus repair Piriformis release Sciatic neurolysis Removal of loose body
	Group 2			Articular cartilage damage Labral tear Ligamentum teres tear	Microfracture Chondroplasty	Repair Reconstruction Debridement	Femoral osteoplasty Acetabular osteoplasty	Release Repair	Lig teres treatment Subchondral cyst removal Notchplasty Subspine decompression Iliopsoas release Trochanteric bursectomy Gluteus medius/minimus repair Piriformis release Sciatic neurolysis Removal of loose body
Chen et al. (2018)	Selective Debridement With Labral Preservation Using Narrow Indications in the Hip: Minimum 5-Year Outcomes With a Matched-Pair Labral Repair Control Group	Arthroscopic selective labral debridement Preoperative scores for the modified Harris Hip Score (mHHS), Non-Arthritic Hip Score (NAHS), Hip Outcome Score–Sports-Specific Subscale (HOS-SSS), and visual analog scale (VAS) for pain. Control: Patients with preoperative PRO scores who did not meet any of the exclusion criteria and who underwent labral repair were considered for inclusion in the contro…	Preoperative acetabular or femoral head Outerbridge grade 4 chondral damage, Preoperative Tönnis grade 2, workers’ compensation claims, Previous hip conditions (eg, slipped capital femoral epiphysis, avascular necrosis, Legg-Calve-Perthes disease), severe dysplasia (lateral center-edge angle <18°), Previous ipsilateral hip surgery	Articular cartilage damage Labral tear Ligamentum teres tear	Microfracture Chondroplasty	Debridement	Femoral osteoplasty Acetabular osteoplasty	Release Repair Plication	Lig teres debridement Synovectomy Iliopsoas lengthening Trochanteric bursectomy Gluteal repair Removal of loose bodies
Clapp et al (2019)	Comparing Outcomes of Competitive Athletes Versus Nonathletes Undergoing Hip Arthroscopy for Treatment of Femoroacetabular Impingement Syndrome	Symptomatic FAIS, Failure of nonoperative management Minimum of 2-year follow-up. Identified athletic status	Hip arthroscopy for an indication other than FAIS, History of bilateral hip surgery, Prior ipsilateral hip surgery, Signs of osteoarthritis ( Tönnis grade .1), Hip dysplasia (lateral center-edge angle <20°), History of congenital hip disorders (slipped capital femoral epiphysis, developmental hip dysplasia, etc)	NR	NR	NR	NR	NR	NR
	Group 2			NR	NR	NR	NR	NR	NR
Cvetanovich et al (2017)	Do Patients With Borderline Dysplasia Have Inferior Outcomes After Hip Arthroscopic Surgery for Femoroacetabular Impingement Compared With Patients With Normal Acetabular Coverage?	Primary hip arthroscopic surgery for a primary diagnosis of symptomatic FAI that failed non-operative treatment	Revision surgery, Surgery for an indication other than FAI, Preoperative LCEA <18°, preoperative LCEA >40° Inaccessible preoperative radiographs	Articular cartilage damage Labral tear	Nil	Repair	Femoral osteoplasty Acetabular rim trim	closure	Trochanteric bursectomy Iliotibial band release
	Group 2			Articular cartilage damage Labral tear	microfracture	Repair	Femoral osteoplasty Acetabular rim trim	closure	Psoas release Trochanteric bursectomy Iliotibial band release
Cvetanovich et al. (2018)	Hip Arthroscopic Surgery for Femoroacetabular Impingement With Capsular Management: Factors Associated With Achieving Clinically Significant Outcomes	Clinical and radiographic diagnoses of FAI Inability to achieve patient satisfaction with nonsurgical management (including physical therapy, activity modification, oral anti-inflammatory drugs, and for some patients fluoroscopically guided intra-articular corticosteroid injections), Undergoing hip arthroscopic surgery with routine capsular repair to address FAI.	Prior ipsilateral hip surgery Hip arthroscopic surgery for an indication other than FAI.	Pincer deformity Cam deformity Articular cartilage damage	Microfracture Chondroplasty	Repair Debridement	Femoral osteoplasty Acetabular osteoplasty (rim trim)	Repair	Psoas release ITB release
Davis et al. (2016)	IMPROVEMENTS IN KNEE EXTENSION STRENGTH ARE ASSOCIATED WITH IMPROVEMENTS IN SELF-REPORTED HIP FUNCTION FOLLOWING ARTHROSCOPY FOR FEMOROACETABULAR IMPINGEMENT SYNDROME	FAIS Athletes	Diagnosed with osteopenia or osteoporosis, Diagnosed with moderate to advanced osteoarthritis at the time of the procedure (Tönnis grade > 1 on radiographic examination) Had a history of lumbar spine or lower extremity surgery (e.g. laminectomy or knee ligament reconstruction) or injury that required a period of immobilization or non-weight-bearing.	NR	NR	NR	NR	NR	NR
Degen (2016)	Return-to-play rates following arthroscopic treatment of femoroacetabular impingement in competitive baseball players	High-level baseball players (professional, college, high school, or competitive club team), either an alpha angle > 50°, lateral center-edge angle > 40° or a type II or III subspine Clinical examination consistent with features of FAI	Evidence of osteoarthritis (Tönnis Grade 2 or greater).	Pincer deformity Cam deformity Articular cartilage damage Labral tear	NR	Repair	Femoral osteoplasty Acetabular osteoplasty	Closure	Subspine decompression
Degen et al. (2016)	Simultaneous Versus Staged Bilateral Hip Arthroscopy in the Treatment of Femoroacetabular Impingement	Simultaneous, bilateral hip arthroscopy for FAI	Follow-up of less than 12 months	NR	Chondroplasty	Repair Debridement	Femoral osteoplasty Acetabular osteoplasty AIIS decompression	NR	NR
	Group 2			NR	Chondroplasty	Repair Debridement	Femoral osteoplasty Acetabular osteoplasty AIIS decompression	NR	Iliopsoas release
Domb et al. (2018)	Patient-Reported Outcomes of Capsular Repair Versus Capsulotomy in Patients Undergoing Hip Arthroscopy: Minimum 5-Year Follow-up-A Matched Comparison Study	Patients of all ages Hip arthroscopy for the treatment of labral tear Documented capsular release or closure (repair or plication), Lateral-center edge angle >18° Minimum 5-year follow-up.	Previous ipsilateral hip surgery Hip conditions such as Legg-Calve Perthes disease, avascular necrosis, slipped capital femoral epiphysis, Preoperative Tönnis osteoarthritis grade >1.	Pincer deformity Cam deformity Mixed cam/pincer Articular cartilage damage Labral tear	Microfracture	Repair Reconstruction Debridement resection	Femoral osteoplasty Acetabular osteoplasty	Release	Lig teres debridement Iliopsoas lengthening Loose body removal Trochanteric bursectomy Gluteal repair
				Pincer deformity Cam deformity Mixed cam/pincer Articular cartilage damage Labral tear	Microfracture	Repair Reconstruction Debridement	Femoral osteoplasty Acetabular osteoplasty	Plication	Lig teres debridement Iliopsoas lengthening Loose body removal Trochanteric bursectomy Gluteal repair
Domb et al. (2016)	Patient reported outcomes for patients who returned to sport compared with those who did not after hip arthroscopy: minimum 2-year follow-up	Identified as active in sport 2 year follow-up	Not active in sport or not reported	NR
	Group 2			NR
Domb et al. (2014)	Arthroscopic hip surgery with a microfracture procedure of the hip: Clinical outcomes with two-year follow-up	WC and non-WC patients treated with microfracture for full thickness cartilage defects performed during arthroscopic hip surgery	Previous hip conditions such as Legg-Calves-Perthes disease, avascular necrosis (AVN), Tönnis grade ≥2.	Reported for whole group only: Pincer deformity Cam deformity Articular cartilage damage (chondral defect) Labral tear Ligamentum teres tear Subspine impingement Hypertrophic labrum Synovitis Trochanteric bursitis Os acetabulum Acetabular notch Adhesive capsulitis capsular stiffness Hip flexor tendonitis Snapping hip	NR	Repair Reconstruction Debridement Base refixation Excision Resection	Femoral osteoplasty Acetabular osteoplasty	Release Repair Plication	Lig teres debridement Synovectomy Iliopsoas release Removal of loose body Trochanteric bursectomy
	Group 2			Whole group	NR	Repair Reconstruction Debridement Base refixation	Femoral osteoplasty Acetabular osteoplasty	Release Repair Plication Partial capsulotomy	Lig teres debridement Synovectomy Iliopsoas release Removal of loose body
Domb et al. (2016)	Clinical Outcomes of Hip Arthroscopic Surgery: A Prospective Survival Analysis of Primary and Revision Surgeries in a Large Mixed Cohort	All hip arthroscopic procedures (primary and revision) in patients who agreed to participate in the study with a minimum 2-year follow-up	Previous hip condition such as acetabular fractures, avascular necrosis, Legg-Calve-Perthes disease, Ehlers- Danlos syndrome, and pigmented villonodular synovitis	Pincer deformity Cam deformity Central acetabular osteophyte Iliopsoas impingement Dysplasia Synovitis Trochanteric bursitis Microinstability Heterotopic ossification Loose bodies	Microfracture Chondroplasty	Repair Reconstruction Debridement	Femoral osteoplasty Acetabular osteoplasty	Release Repair Partial capsulotomy	Subchondral cyst removal Notchplasty Lig teres treatment Ilopsoas release ITB release Trochanteric bursectomy Gluteal repair Piriformis release Sciatic neurolysis Removal of loose bodies Removal of heterotropic ossification
	Group 2			Not using group 2 data
Domb et al. (2015)	Outcomes of hip arthroscopy in patients aged 50 years or older compared with a matched-pair control of patients aged 30 years or younger	Primary hip arthroscopy during the study period Minimum of 2 years’ follow-up Radiographs and patient-reported outcome (PRO) scores	Revision surgery, Tönnis grade greater than 1, Previous hip conditions such as Legg-Calvé-Perthes disease, avascular necrosis, Prior surgical intervention	NR	NR	Repair Debridement	Femoral osteoplasty Acetabular osteoplasty	Release Repair	Lig teres debridement Ilopsoas fractional lengthening Trochanteric bursectomy Synovectomy Removal loose body Acetabular notchplasty Gluteal repair
	Group 2
Domb et al. (2013)	Surgical dislocation of the hip versus arthroscopic treatment of femoroacetabular impingement: A prospective matched-pair study with average 2-year follow-up	30 years or younger, Diagnosis of FAI, Treated with surgical dislocation or arthroscopic surgery	Tönnis grade 2 or greater, Developmental dysplasia of the hip, Legg-Calve-Perthes disease, Previous hip surgery
	Group 2			NR	NR	NR	NR	NR	NR
Domb et al. (2015)	Influence of capsular repair versus unrepaired capsulotomy on 2-year clinical outcomes after arthroscopic hip preservation surgery	Patients able to consent to participation in the study, Age 18 to 65 years, English speaking, Intra-articular hip pathology amenable to arthroscopic treatment as a primary procedure, Follow-up of at least 2 years, Clear documentation in the available operative notes of which capsular procedure was selected.	Extra-articular work only without concomitant access to the intracapsular joint space; Non-English speaking; Follow-up of less than 2 years; Age younger than 18 or older than 65 years; Inability or objection to participation; Previous hip condition (prior surgery, acetabular fracture, avascular necrosis, Legg- Calvé-Perthes disease, or globalmorphologic abnormality requiring surgical dislocation)…	NR	NR	NR	NR	Release	NR
	Group 2			NR	NR	NR	NR	Repair	NR
Domb et al. (2018)	Hip Arthroscopic Surgery With Labral Preservation and Capsular Plication in Patients With Borderline Hip Dysplasia: Minimum 5-Year Patient-Reported Outcomes	>40 years of age at the time of surgery Borderline dysplasia, defined as an LCEA between 18° and 25°; Minimum 5-year follow-up; Concurrent labral preservation and capsular plication	≥40 years of age, Perthes disease, slipped capital femoral epiphysis, inflammatory arthritis, osteoarthritis (Tönnis grade ≥2), or avascular necrosis	Articular cartilage damage Labral tear Ligamentum teres tear	Chondroplasty	Repair Debridement	Femoral osteoplasty Acetabular rim Decortication	Plication	Lig teres debridement Iliopsoas fractional lengthening Loose body removal Trochanteric bursectomy
Domb et al. (2017)	Outcomes of Hip Arthroscopic Surgery in Patients With Tönnis Grade 1 Osteoarthritis at a Minimum 5-Year Follow-up: A Matched-Pair Comparison With a Tönnis Grade 0 Control Group	Primary arthroscopic surgery Preoperative diagnosis of FAI and labral tears Preoperatively documented modified Harris Hip Score (mHHS), Non-Arthritic Hip Score (NAHS),7 Hip Outcome Score–Sports-Specific Subscale (HOS-SSS), and visual analog scale (VAS) scores.	Workers’ compensation claims at the time of surgery; Previous ipsilateral surgical interventions; Preoperative Tönnis grade ≥2 OA; Previous conditions including hip fractures, Slipped capital femoral epiphysis, Avascular necrosis, Hip dysplasia (lateral center edge angle[LCEA≥18°).	Articular cartilage damage Labral tear Ligamentum teres tear	Microfracture	Repair Reconstruction Debridement Resection	Femoral osteoplasty Acetabular osteoplasty	Release Repair /Plication	Lig teres debridement Synovectomy Iliopsoas fractional lengthening Removal loose body Trochanteric bursectomy Notchplasty
				Articular cartilage damage Labral tear Ligamentum teres tear	Microfracture	Repair Reconstruction Debridement Resection	Femoral osteoplasty Acetabular osteoplasty	Release Repair /Plication	Lig teres debridement Synovectomy Iliopsoas fractional lengthening Removal loose body Trochanteric bursectomy Notchplasty
Domb et al. (2013)	Arthroscopic Capsular Plication and Labral Preservation in Borderline Hip Dysplasia: Two-Year Clinical Outcomes of a Surgical Approach to a Challenging Problem	Hip arthroscopy for symptomatic intra-articular hip disorders refractory to nonoperative management April 2008 to November 2010, < 40 years old, Lateral angle >18° and <25°	Patients with Tönnis grade ≥2, Severe hip dysplasia Legg-Calve-Perthes disease	Articular cartilage damage Labral tear Ligamentum teres tear	Microfracture Chondroplasty	Repair Debridement	Femoral osteoplasty	Plication	Lig teres debridement Iliopsoas release Trochanteric bursectomy Loose body removal
Domb et al. (2017)	Arthroscopic Labral Base Repair in the Hip: 5-Year Minimum Clinical Outcomes	Labral repair by the LBR suture technique Preoperative and minimum 5-year postoperative scores for the following patient-reported outcomes (PROs): the modified Harris Hip Score (mHHS), Non-Arthritic Hip Score (NAHS), Hip Outcome Score– Sport-Specific Subscale (HOS-SSS), and visual analog scale (VAS) for pain.	Preoperative Tönnis osteoarthritis grade ≥2, Previous hip conditions, Severe dysplasia (lateral center-edge angle >18°), Workers’ compensation status, Previous ipsilateral hip surgery	Articular cartilage damage Labral tear Ligamentum teres tear	Microfracture Chondroplasty	Repair	Femoral osteoplasty Acetabular osteoplasty	Release Repair / Plication	Lig teres debridement Synovectomy Iliopsoas fractional lengthening Loose body removal Trochanteric bursectomy
Domb et al. (2018)	Acetabular microfracture in hip arthroscopy: clinical outcomes with minimum 5-year follow-up	Acetabular microfracture for chondral defects Primary hip arthroscopy Eligible for 5-year follow up.	Previous ipsilateral hip conditions such as previous hip surgeries, hip fractures, slipped capital femoral epiphysis, femoral avascular necrosis, and hip dysplasia (lateral center edge angle <18°), Preoperative Tönnis grade >1, Active workers’ compensation claims at the time of surgery, Gluteus medius repair or femoral head microfracture	Articular cartilage damage Labral tear	Acetabular Microfracture	Repair Reconstruction Debridement	Femoral osteoplasty Acetabular osteoplasty	Release Repair/ Plication	NR
Fabricant et al (2015)	The Effect of Femoral and Acetabular Version on Clinical Outcomes After Arthroscopic Femoroacetabular Impingement Surgery	<60 years of age; Underwent an index primary hip arthroscopy procedure without a psoas release from October 1, 2010, to October 1, 2012, Primary diagnosis of FAI; Relevant preoperative and one-year postoperative assessments including one or more of the four outcomes instruments	Dysplasia (lateral center-edge angle of <20°, anterior center-edge angle of <20°, Tönnis angle of >10°, and/or posterior wall undercoverage) or degenerative changes greater than Tönnis grade I	Pincer deformity Cam deformity Articular cartilage damage Labral tear	Microfracture	Repair Debridement	Femoral osteoplasty Acetabular osteoplasty (rim and subspine)	NR	NR
Flores (2018)	Hip Arthroscopic Surgery for Femoroacetabular Impingement: A Prospective Analysis of the Relationship BetweenSurgeon Experience and Patient Outcomes	Patients diagnosed with symptomatic pincer, cam, or mixed-type FAI Failure of conservative management and physical therapy	Hip dysplasia, Osteoarthritis, Hypermobility Non-FAI surgery	Pincer deformity Cam deformity Articular cartilage damage Labral tear	Microfracture	Repair Debridement	Femoral osteoplasty Acetabular osteoplasty	NR	NR
	Group 2			Pincer deformity Cam deformity Articular cartilage damage Labral tear	none	Repair Debridement	Femoral osteoplasty Acetabular osteoplasty	NR	NR
Flores et al. (2018)	Arthroscopic Treatment of Acetabular Retroversion With Acetabuloplasty and Subspine Decompression: A Matched Comparison With Patients Undergoing Arthroscopic Treatment for Focal Pincer-Type Femoroacetabular Impingement	Symptomatic focal pincer-type FAI or FAI secondary to acetabular retroversion, Failure of conservative management and physical therapy Clinical examination findings consistent with FAI, such as a positive flexion, adduction, and internal rotation test result	Osteoarthritis, Hypermobility, >60 years of age	Articular cartilage damage Labral tear Wave sign	Microfracture Chondroplasty	Repair	Femoral osteoplasty Acetabular osteoplasty	Repair	Sub spine decompression
Flores et al. (2018)	When Do Patients Improve After Hip Arthroscopy for Femoroacetabular Impingement? A Prospective Cohort Analysis	Symptomatic patients with indications for hip arthroscopy who had cam and/ or pincer-type FAI and labral tear and with failure of nonoperative treatment, including activity modification and physical therapy	Hip dysplasia Osteoarthritis (Tönnis grade >1), Hypermobility	Pincer deformity Cam deformity Articular cartilage damage Labral tear	Microfracture Chondroplasty	Repair Debridement	Femoral osteoplasty Acetabular osteoplasty	Repair	Subspine decompression
Frank et al (2019)	Do Female Athletes Return to Sports After Hip Preservation Surgery for Femoroacetabular Impingement Syndrome? A Comparative Analysis	Female Hip arthroscopic surgery between January 2012 and January 2015 FAIS Failed nonoperative management, Minimum of 2-year follow-up.	Retired athletes, Patients unwilling to participate in the study, Symptomatic FAIS in the contralateral hip requiring surgery, Revision surgery, Ipsilateral knee and ankle injury/surgery within the postoperative period, Follow-up less than 2 years, History of paediatric deformities (developmental dysplasia of the hip [lateral center-edge angle <20°, slipped capital femoral epiphysis and Perthes d…	Pincer deformity Cam deformity Articular cartilage damage Labral tear	Chondroplasty	Repair	Femoral osteoplasty Acetabular rim trim	Plication	NR
	Group 2			Pincer deformity Cam deformity Articular cartilage damage Labral tear	Chondroplasty	Repair	Femoral osteoplasty Acetabular rim trim	Plication	NR
Frank et al (2018)	High Rate of Return to Yoga for Athletes After Hip Arthroscopy for Femoroacetabular Impingement Syndrome	Diagnosis of FAIS Self-reported participation in yoga Minimum clinical follow up 1 year	History of rheumatologic disease, Tönnis grade >1, Hip dysplasia (LCEA, <20°), Prior history of congenital hip dislocation, Perthes disease, slipped capital femoral epiphysis, revision surgery, neurological disorders, and/or concomitant orthopaedic conditions (ipsilateral limb injuries, scoliosis, sacroiliac joint dysfunction).	Pincer deformity Cam deformity Articular cartilage damage Labral tear	Chondroplasty	Repair	Femoral osteoplasty Acetabular rim trim	Closure	Trochanteric bursectomy Synovectomy
Frank et al.(2018)	High Rate of Return to Swimming After Hip Arthroscopy for Femoroacetabular Impingement	Diagnosis of FAIS Self-reported swimming athletes Minimum clinical follow-up duration of 2 years	History of rheumatologic disease, Tönnis grade greater than 1, Dysplasia (LCEA <20°), History of congenital hip dislocation, Perthes disease, slipped capital femoral epiphysis, neurologic disorders, and/or concomitant orthopaedic conditions (ipsilateral limb injuries, scoliosis, or sacroiliac joint dysfunction)	Pincer deformity Cam deformity Mixed cam/pincer Articular cartilage damage Labral tear	Chondroplasty	Repair	Femoral osteoplasty Acetabular rim trim	Closure	NR
Frank et al. (2017)	High Rate of Return to Cycling After Hip Arthroscopy for Femoroacetabular Impingement Syndrome	Recreational or competitive cyclists Hip arthroscopy for FAIS between 2012 and 2014, Minimum clinical follow-up of 2 years	Revision arthroscopy History of rheumatologic disease, Tönnis grade > 1, Hip dysplasia (LCEA <20°), Prior history of congenital hip dislocation, Perthes disease, slipped capital femoral epiphysis, neurological disorders, and/or concomitant orthopaedic conditions (ipsilateral limb injuries, scoliosis, sacroiliac joint dysfunction).	Pincer deformity Cam deformity Mixed Cam/Pincer Articular cartilage damage Labral tear	Microfracture Chondroplasty	Repair	Femoral osteoplasty Acetabular rim trim	Plication	Heterotopic ossification excision
Frank et al. (2014)	Improved Outcomes After Hip Arthroscopic Surgery in Patients Undergoing T-Capsulotomy With Complete Repair Versus Partial Repair for Femoroacetabular Impingement: A Comparative Matched-Pair Analysis	Aged 16 to 65 years Physical examination and imaging findings consistent with symptomatic FAI Unilateral hip arthroscopic surgery including acetabular rim trimming, femoral osteochondroplasty, labral repair or debridement, and capsular repair Failed nonoperative management (consisting of therapy and/or intra-articular corticosteroid injections) Minimum 2-year follow-up.	Bilateral labral lesions, Bilateral symptomatic FAI, History of significant ipsilateral hip or knee injury, History of ipsilateral hip or knee surgery, Significant lumbosacral spine lesion, Workers’ compensation cases, Other major medical comorbidities	NR	NR	Repair	Femoral osteochondroplasty Acetabular rim trim	T capsulotomy – partial repair	Psoas release
	Group 2			NR	NR	Repair	Femoral osteochondroplasty Acetabular rim trim	T capsulotomy complete repair	Psoas release
Frank et al. (2016)	Outcomes for Hip Arthroscopy According to Sex and Age: A Comparative Matched-Group Analysis	Arthroscopy between November 2011 and December 2012 History, physical examination, and imaging findings consistent with symptomatic femoroacetabular impingement Minimum 2-year follow-up	Acetabular dysplasia, History of substantial ipsilateral hip or knee injury, History of ipsilateral hip surgical procedure, Substantial lumbosacral spine pathology, Bilateral labral tears, Bilateral symptomatic femoroacetabular impingement, Bilateral hip arthroscopy, Acetabular dysplasia, Revision surgical procedure, Labral reconstruction, Workers’ Compensation cases	NR	Chondroplasty	Repair Debridement	Femoral osteoplasty Acetabular osteoplasty/rim trim	Repair	NR
	Group 2			NR	Chondroplasty	Repair Debridement	Femoral osteoplasty Acetabular osteoplasty/rim trim	Repair	NR
Glaws et al. (2018)	Return to Sport Rates in Physically Active Individuals Six Months After Arthroscopy for Femoroacetabular Impingement Syndrome	Physically active individuals who planned to undergo hip arthroscopy for unilateral FAIS between April 2012 to March 2014. Age 14 to 50 years Diagnosis of FAIS per radiographic findings and clinical examination; Failed conservative management; Reported relief with diagnostic intraarticular injection; Participated in cutting, jumping, pivoting, or lateral movement activities for at least 50 hours …	Diagnosed with osteopenia or osteoporosis, Diagnosed with moderate to advanced osteoarthritis (Tönnis grade >1 on preoperative radiographic examination), History of serious lumbar spine or lower-extremity injuryor surgery (eg, laminectomy or knee ligament reconstruction).	NR	NR	Repair	Femoral osteoplasty Femoral & acetabular osteplasty	NR	NR
	Group 2			NR	NR	Repair	Femoral osteoplasty Femoral & acetabular osteplasty	NR	NR
AS above - whole cohort				NR
Gupta et al (2016)	Does Primary Hip Arthroscopy Result in Improved Clinical Outcomes?: 2-Year Clinical Follow-up on a Mixed Group of 738 Consecutive Primary Hip Arthroscopies Performed at a High-Volume Referral Center?	Primary hip arthroscopy surgeries patients who agreed to participate in the study Minimum 2-year follow-up.	Tönnis grade ≥2 Any previous hip condition, such as acetabular fracture, avascular necrosis, Legg-Calve´ - Perthes disease, Ehlers-Danlos syndrome, and pigmented villonodular synovitis	Pincer deformity Cam deformity Articular cartilage damage Labral tear Synovitis Trochanteric bursitis Loose body Gluteus medius tear Acetabular notch osteophyte Os acetabuli	Microfracture Chondroplasty	Repair Reconstruction Debridement Resection	Femoral osteoplasty Acetabular osteoplasty	Release Repair	Lig teres debridement Iliopsoas release Synovectomy Trochanteric bursectomy Loose body removal Glut med repair Excision of bone cyst Acetabular notchplasty Os acetabulum removal ITB release Piriformis release Sciatic neurolysis Arthroscopic screw removal Pubic symphysis resection
Gupta et al. (2015)	Does Obesity Affect Outcomes in Hip Arthroscopy?: A Matched-Pair Controlled Study With Minimum 2-Year Follow-up	primary hip arthroscopy during the study period February 2008 to February 2012, minimum 2-year follow-up with radiographs and patient-reported outcome (PRO) scores	Revision surgeries, Tönnis grade >1, Previous hip conditions, such as Legg-Calves-Perthes disease, avascular necrosis, Prior surgical intervention	NR	NR	Repair Debridement	Femoral osteoplasty Acetabular osteoplasty	Release Repair	Lig teres debridement Synovectomy Iliopsoas lengthening Trochanteric brsectomy Removal loose body Acetabularnotchplasty Gluteus medius repair Piriformis release Sciatic nerve neurolysis
	Group 2			NR	NR	Repair Debridement	Femoral osteoplasty Acetabular osteoplasty	Release Repair	Lig teres debridement Synovectomy Iliopsoas lengthening Trochanteric brsectomy Removal loose body Acetabularnotchplasty Gluteus medius repair
Hartigan et al. (2018)	Outcomes of Femoral Head Marrow Stimulation Techniques at Minimum 2-Year Follow-up	Femoral head marrow stimulation technique performed at the time of hip arthroscopy (between February 2008 and October 2015), Grade IV chondral damage of the femoral head, Greater than 2 years of follow up.	Tönnis grade >1, Lateral center edge angle < 20°, Perthes disease of the hip, Magnetic resonance imaging diagnosis of avascular necrosis, slipped capital femoral epiphysis, inflammatory arthritis, Previous hip surgery, Coxa profunda or protrusio, Concomitant abductor repair	NR	Microfracture	Repair Debridement	Femoral osteoplasty Acetabular osteoplasty	Release Repair /Plication	Iliopsoas release Lig teres debridement Notch plasty
	Group 2			NR	No microfracture	Repair Debridement	Femoral osteoplasty Acetabular osteoplasty	Release Repair /Plication	Iliopsoas release Lig teres debridement Notch plasty
Hartigan et al. (2017)	Clinical outcomes of hip arthroscopic surgery in patients with femoral retroversion: A matched study to patients with normal femoral anteversion	Arthroscopy between November 2011 and September 2013, MRI-confirmed version calculated at ≤0° Follow up greater than 2 years	Perthes disease, Inflammatory arthritis, Slipped capital femoral epiphysis, Previous hip surgery, Abductor repair, Lateral center-edge angle (LCEA) <20°, Tönnis grade >1, Acetabular profunda (acetabulum medial to the ilioischial line) or protrusio (femoral head medial to the ilioischial line).	NR	Microfracture	Repair Reconstruction Debridement	Femoroplasty Acetabuloplasty	Repair	Lig teres treatment Iliopsoas release Notch plasty
	Group 2			NR	Microfracture	Repair Reconstruction Debridement	Femoroplasty Acetabuloplasty	Repair	Lig teres treatment Iliopsoas release Notch plasty
Hartigan et al. (2017)	Results of hip arthroscopy in patients with MRI diagnosis of subchondral cysts-a case series	Arthroscopy between February 2008 and March 2013, >2 year follow-up MRI findings of subchondral cysts in the acetabulum, femoral head, or both	Previous surgery on the same hip, LCEA ≤20°, Tönnis grade>1, Inflammatory arthritis, Perthes, Slipped capital femoral epiphysis Concomitant abductor repair	NR	Microfracture	Repair Debridement	Femoroplasty Acetabuloplasty	Release Repair Plication	Notchplasty Lig teres treatment Iliopsoas release Iliopsoas bursectomy Trochanteric bursectomy Removal of loose body
Hartigan et al. (2016)	Clinical Outcomes of Hip Arthroscopy in Radiographically Diagnosed Retroverted Acetabula	Between June 2008 and February 2012, 22 months of follow-up, age ≤40 years, Tönnis grade of 0 or 1. Positive crossover sign, positive ischial spine, positive posterior wall sign	Inflammatory arthritis, Previous hip surgery, Peritrochanteric operations, Labral reconstruction, Avascular necrosis, Previous slipped capital femoral epiphysis, Perthes hip	NR	Microfracture	Repair Debridement	Femoroplasty Acetabuloplasty	Release Repair	Lig teres debridement Lig teres repair Synovectomy
Hassebrock et al (2019)	Bilateral Hip Arthroscopy: Can Results From Initial Arthroscopy for Femoroacetabular Impingement Predict Future Contralateral Results?	Staged bilateral hip arthroscopy for failed nonoperative treatment FAI and labral tears Minimum 2-year follow up.	Did not complete 2-year follow up and outcome scores, Previous hip surgery, Peritrochanteric or deep gluteal space procedures, Avascular necrosis, Pediatric hip conditions (Perthes/slipped capital femoral epiphysis).	NR	Microfracture	Repair Reconstruction Debridement	Femoral osteoplasty Acetabular osteoplasty	Release Repair	Lig teres debridement Iliopsoas release
	Group 2			NR	Microfracture	Repair Reconstruction Debridement	Femoral osteoplasty Acetabular osteoplasty	Release Repair	Lig teres debridement Iliopsoas release
Hevesi et al (2019)	Is Microfracture Necessary? Acetabular Chondrolabral Debridement/Abrasion Demonstrates Similar Outcomes and Survival to Microfracture in Hip Arthroscopy: A Multicenter Analysis	Primary hip arthroscopy between November 2008 and April 2016, Age<55 years, Isolated acetabular chondral damage present as grade 3 or 4 acetabular labrum articular disruption (ALAD) Arthroscopic labral repair performed at the time of surgery, Availability of preoperative radiographs, Consent for research participation.	Less than 2 years of clinical follow-up, Bipolar cartilage lesions with femoral head Outerbridge grade 3 or 4 changes, Lateral center-edge angle (LCEA)<20°, Previous ipsilateral hip surgery	Pincer deformity Cam deformity Articular cartilage damage Labral tear	Debridement Abrasion	Repair	Femoral osteoplasty Acetabular osteoplasty	Repair No repair	Lig teres debridement Psoas release
	Group 2			Pincer deformity Cam deformity Articular cartilage damage Labral tear	Microfracture	Repair	Femoral osteoplasty Acetabular osteoplasty	Repair No repair	Lig teres debridement Psoas release
Hevesi et al (2018)	Are Results of Arthroscopic Labral Repair Durable in Dysplasia at Midterm Follow-up? A 2-Center Matched Cohort Analysis	Primary hip arthroscopy between February 2008 and December 2011, Consent for research participation, and Arthroscopic labral repair performed at the time of surgery	≤5 years of clinical follow-up, Isolated labral debridement or reconstruction, Previous ipsilateral hip surgery		NR	Repair	NR	NR	Lig teres debridement Psoas release
	Group 2			Pincer deformity Cam deformity Mixed cam/pincer Articular cartilage damage Labral tear	NR	Repair	NR	NR	Lig teres debridement Psoas release
Hevesi et al. (2018)	Multicenter Analysis of Midterm Clinical Outcomes of Arthroscopic Labral Repair in the Hip: Minimum 5-Year Follow-up	Primary hip arthroscopic surgery between February 2008 and December 2011 Consented to research participation Labral repair performed at the time of surgery	<5 years of clinical follow-up, Patients choosing not to participate in outcome surveys, Labral debridement, labral reconstruction, and previous hip surgery	Pincer deformity Cam deformity Articular cartilage damage Labral tear Dysplasia Ligamentum teres lesion	NR	Repair	Femoral osteoplasty Acetabular osteoplasty	Repair	Lig teres debridement Psoas release
Ibrahim et al. (2018)	Does acetabular coverage influence the clinical outcome of arthroscopically treated cam-type femoroacetabular impingement (FAI)?	Arthroscopic cam resection	Patients with combined cam- and pincer type FAI who underwent acetabular rim trimming Labral disease without cam type FAI Previous hip surgery including arthroscopy; Less than one year follow-up, Missing functional outcome data	Cam deformity	Microfracture	Debridement	Femoral osteoplasty	Partial capsulotomy	Stabilisation
Ishoi et al (2018)	Return to Sport and Performance After Hip Arthroscopy for Femoroacetabular Impingement in 18- to 30-Year-Old Athletes	Male and female patients age 18 to 30 years at the time of surgery and age 35 years or younger at the time of follow up; Pre surgery cam deformity on plain radiograph (alpha angle 55°); Surgical procedure consisting of least cam resection and acetabular labral surgery	Joint space width less than 3 mm; Grade 4 on the Beck cartilage classification (exposed bone in the acetabulum); grade 4 on the International Cartilage Repair Society (ICRS) cartilage classification (exposed bone of the femoral head); Previous hip arthroscopy in the same hip joint; Previous hip pathologic conditions such as Perthes disease, slipped capital femoral epiphysis, hip dysplasia (latera…	Cam deformity	NR	NR	Cam resection	NR	NR
Jackson et al. (2015)	Acetabular Labral Base Repair Versus Circumferential Suture Repair: A Matched-Paired Comparison of Clinical Outcomes	patients who were identified as having had either the LBR or CS pattern by the senior surgeon (B.G.D.) during the period from February 2008 to February 2012. 2-year follow-up Repair type (LBR or CS) was documented on a research data collection form at the time of surgery	Pre-existing conditions such as fracture, Legg-Calvé- Perthes disease, or avascular necrosis; Concomitant procedures such as periacetabular osteotomy, femoral osteotomy, or labral debridement; Previous hip surgery.	NR	NR	Repair – labral base	Femoral osteoplasty Acetabular osteoplasty	Release Repair / Plication	Iliopsoas release Trochanteric bursectomy Lig teres debridement Synovectomy Removal of loose body/ bone cyst/ heterotopic ossification / os acetabulum ITB release
	Group 2			NR	NR	Repair- circumferential sutures	Femoral osteoplasty Acetabular osteoplasty	Release Repair / Plication	Iliopsoas release Trochanteric bursectomy Gluteus medius repair Lig teres debridement Synovectomy Removal of loose body/ os acetabulum ITB release
Jackson et al. (2015)	Effect of femoral anteversion on clinical outcomes after hip arthroscopy	Patients who underwent primary hip arthroscopy between August 2008 and April 2011, and underwent femoral anteversion measurement by magnetic resonance imaging (MRI)/magnetic resonance arthrogram(MRA)	Tönnis arthritis grade greater than 1, Inflammatory arthropathy, Legg-Calvé-Perthes disease, MRI/MRA without femoral anteversion measurement	Pincer deformity Cam deformity Combined pincer and cam	NR	Repair Debridement	NR	Repair	Iliopsoas release
				Pincer deformity Cam deformity Combined pincer and cam	NR	Repair Debridement	NR	Repair	Iliopsoas release
				Pincer deformity Cam deformity Combined pincer and cam	NR	Repair Debridement Reconstruction	NR	Repair	Iliopsoas release
Kang et al.(2009)	Acetabular Labral Tears in Patients with Sports Injury	Sport more than 4 hours a day and 5 days per week for more than 1 year until hip pain developed FAI Labral tear	NR	Pincer deformity Cam deformity Articular cartilage damage Labral tear	Chondroplasty	Repair Debridement	Femoral osteoplasty Acetabular osteoplasty	NR	NR
Kemp et al. (2014)	Hip chondropathy at arthroscopy: prevalence and relationship to labral pathology, femoroacetabular impingement and patient-reported outcomes	Aged 18 and 60 years, Hip arthroscopy for painful intra-articular hip pathology between January 2009 and July 2011, 12 and 24 months post surgery	Unable to walk without assistance, Unable to speak or read English, Converted to total hip arthroplasty, Undergone further hip or other surgery Had another concurrent lower limb injury	NR	Debridement Microfracture	Repair Debridement	Femoral osteoplasty Acetabular osteoplasty	NR	NR
	Group 2			NR	Debridement Microfracture	Repair Debridement	Femoral osteoplasty Acetabular osteoplasty	NR	NR
	Group 3			NR	Debridement Microfracture	Repair Debridement	Femoral osteoplasty Acetabular osteoplasty	NR	NR
Kierkegaard et al (2019)	Despite patient-reported outcomes improve, patients with femoroacetabular impingement syndrome do not increase their objectively measured sport and physical activity level 1 year after hip arthroscopic surgery. Results from the HAFAI cohort	Primary hip arthroscopic surgery for FAIS Diagnosis of cam and/or pincer impingement, OA grade 0–1 according to Tönnis’ classification Joint space width of > 3 mm Age 18 and 50 years. Age- and gender-matched reference persons were eligible if they had no self-reported hip problems.	Previous corrective hip surgery of the included hip, FAIS secondary to other hip conditions such as the Legg–Calvé–Perthes disease and epiphysiolysis, Alloplastic surgery at the hip, knee or ankle region (both legs), Cancer, Neurological diseases that affect movement pattern, Inability to speak or understand Danish Pregnancy at the time of inclusion.	Articular cartilage damage	Microfracture	Repair Resection	Femoral osteoplasty Acetabular osteoplasty	NR	NR
	Group 2			Healthy Controls	Healthy Controls	Healthy Controls	Healthy Controls	Healthy Controls	Healthy Controls
Klingenstein et al. (2012)	Hip injuries in the overhead athlete	Varsity high school, collegiate, and professional athletes Overhead sports - baseball and lacrosse. Clinical diagnosis of FAI Radiographic inclusion criteria: Presence of a crossover sign on an AP pelvic radiograph, Elevated alpha angle (>50°) Tönnis Grade 1 or less arthrosis	Prior hip surgery, Tönnis Grade 1 arthrosis, Radiographic evidence of substantial dysplasia	NR	NR	Fixation Debridement	Femoral osteoplasty Acetabular osteoplasty	NR	NR
Krishnamoorthy (2019)	Radiographic Prevalence of Symphysis Pubis Abnormalities and Clinical Outcomes in Patients With Femoroacetabular Impingement Syndrome	Primary hip arthroscopy for FAIS (Jan 2012-Jan 2016) Failed nonoperative management, FAIS.	Bilateral or revision hip arthroscopy, History of paediatric deformities (developmental dysplasia of the hip [lateral center-edge angle <20°], slipped capital femoral epiphysis, and Perthes disease]) Osteoarthritis or joint space narrowing ( Tönnis grade 1), Ipsilateral knee and ankle injury or surgery within the postoperative period, Avascular necrosis of the hip, Gluteus medius repairs, Less th…	NR	NR	NR	NR	NR	NR
	Group 2			NR	NR	NR	NR	NR	NR
Krych et al. (2013)	Arthroscopic labral repair versus selective labral debridement in female patients with femoroacetabular impingement: A prospective randomized study	Female, >17 years of age, Diagnosed with either pincer-type or combined-type (coexistent pincer and cam-type) FAI. Labral tear/pathology on magnetic resonance imaging (MRI).	Pure cam-type FAI, Males Previous hip surgery, Tönnis grade ≥2 osteoarthritis, Hip dysplasia Patient age less than 18.	Pincer deformity Mixed pincer /Cam deformity Labral tear	NR	Repair	Femoral osteochondroplasty Acetabular rim reduction	NR	NR
	Group 2			Pincer deformity Mixed pincer /Cam deformity Labral tear	NR	Debridement	Femoral osteochondroplasty Acetabular rim reduction	NR	NR
Kuhns et al. (2017)	A Comparison of Clinical Outcomes After Unilateral or Bilateral Hip Arthroscopic Surgery: Age- and Sex-Matched Cohort Study	Clinical diagnosis of bilateral FAI with surgical correction of cam and/or pincer deformities. Initial hip arthroscopic procedure must have been performed between January 1, 2012 and January 1, 2014, with the second surgical procedure occurring no later than April 1, 2014. A minimum of 2-year follow-up after the second bilateral surgical procedure Control group: unilateral presentation Unilateral…	Hip arthroscopic surgery for conditions other than FAI, Any history of rheumatological disease, Any prior hip surgery or revision hip arthroscopic surgery, Less than a 2-year follow-up	Pincer deformity Cam deformity Labral tear	Microfracture Delamination	Repair	Femoral osteoplasty Acetabular osteoplasty (rim trim)	NR	Trochanteric bursectomy
	Group 2			Pincer deformity Cam deformity Labral tear	Delamination	Repair	Femoral osteoplasty Acetabular osteoplasty (rim trim)	NR	Trochanteric bursectomy
Kunze et al (2019)	Early Hip Arthroscopy for Femoroacetabular Impingement Syndrome Provides Superior Outcomes When Compared With Delaying Surgical Treatment Beyond 6 Months	Hip arthroscopy between January 2012 and July 2016; FAIS; Minimum 2-year follow-up; Failed nonoperative treatment measures,	Acute traumatic injury Revision or bilateral hip arthroscopy, Length of follow-up <2 years, history of congenital or pediatric deformities (developmental dysplasia of the hip, slipped capital femoral epiphysis, and Legg-Calve´-Perthes disease), Tönnis grade >1.	NR	NR	NR	NR	NR	NR
Lansdown et al. (2018)	The Importance of Comprehensive Cam Correction: Radiographic Parameters Are Predictive of Patient-Reported Outcome Measures at 2 Years After Hip Arthroscopy	Underwent hip arthroscopy between January 1, 2012, to December 31, 2014 History, physical examination, and imaging findings consistent with symptomatic FAI Minimum 2-year follow-up.	Acetabular dysplasia, Moderate osteoarthritis (Tönnis grade >2), History of substantial ipsilateral hip or knee injury, Revision surgical procedure, Labral reconstruction	NR	Microfracture	Repair Debridement	Femoral osteochondroplasty Acetabuloplasty	Plication	NR
Lee et al (2019)	Arthroscopic Repair of Acetabular Labral Tears Associated with Femoroacetabular Impingement: 7-10 Years of Long-Term Follow-up Results	Complete medical records including operation records, follow-up scores and preoperative, postoperative and follow-up radiographs	Legg Calves-Perthes disease, Infectious hip disease, Avascular necrosis, Rheumatic disease, Pyogenic and tuberculous arthritis Diffuse idiopathic skeletal hyperostosis, Ankylosing spondylitis, Severe dysplasia. Tönnis osteoarthritis (OA) grade 2 or more	NR	NR	NR	NR	NR	NR
Levy et al. (2017)	Hip Arthroscopy for Atypical Posterior Hip Pain: A Comparative Matched-Pair Analysis	January 2012 and January 2014 primary hip arthroscopy for symptomatic FAI. Indication for surgery was symptomatic clinical and radiographic diagnosis of FAI	Revision procedures Hip arthroscopic procedures performed for indications other than FAI Other primary pain locations (including the thigh, knee, lateral hip, and lower back)	NR	NR	Repair	Femoral osteochondroplasty Acetabular rim trim	Pilcation	Trochanteric bursectomy
	Group 2			NR	NR	Repair	Femoral osteochondroplasty Acetabular rim trim	Pilcation	Trochanteric bursectomy
Levy et al. (2017)	High Rate of Return to Running for Athletes After Hip Arthroscopy for the Treatment of Femoroacetabular Impingement and Capsular Plication	Underwent hip arthroscopy for FAI from January 1, 2012, to May 15, 2013, Age between 14 and 40 years, Reported running in their clinical history Minimum 2-year clinical follow-up duration.	Any history of rheumatologic disease, dysplasia (lateral center-edge angle of Wiberg [LCEA] <20°), pediatric deformities (congenital hip dislocation, slipped capital femoral epiphysis [SCFE], or Perthes disease), osteoarthritis, or any joint space narrowing (Tönnis grade >0); Less than 2-year follow-up; Concomitant arthroscopic procedures in addition to FAI correction (ie, gluteal repair or troch…	Pincer deformity Cam deformity Mixed pincer/cam Articular cartilage damage Labral tear	Chondroplasty	Repair	Femoral osteoplasty Acetabular osteoplasty (rim trim)	Plication	NR
Locks et al. (2018)	Revision Hip Arthroscopy After Labral Reconstruction Using Iliotibial Band Autograft: Surgical Findings and Comparison of Outcomes With Labral Reconstructions Not Requiring Revision	Underwent labral reconstruction by the senior author required a revision hip arthroscopy following the reconstruction, also by the senior author during July 2006 to May 2014	Patients with history of severe hip pathology (acetabular fracture, avascular necrosis, Legg Calve Perthes disease, Ehlers-Danlos syndrome, pigmented villonodular synovitis) and/or radiographic joint space of 2 mm or less	NR	Microfracture	Reconstruction	NR	NR	NR
	Group 2			Pincer deformity (residual FAI) Cam deformity (residual FAI) Articular cartilage damage Labral tear Capsulolabral adhesion Lig teres tear Psoas impingement Capsular defect Peritrochanteric bursitis	Microfracture	Reconstruction Augmentation Debridement	Femoral osteoplasty Acetabular osteoplasty	Release (Lysis of adhesions) Repair / reconstruction	Lig teres debridement Psoas tendon release Trochanteric bursectomy Capsulolabral spacer ITB release Lig teres repair/reconstruction Sciatic nerve release
Lodhia et al. (2015)	Microfracture in the hip: a matched-control study with average 3-year follow-up	Arthroscopic microfracture during surgery for labral tear and/or femoroacetabular impingement (FAI), with minimum 2-year follow-up.	Revision surgeries, Tönnis grade 2 and higher, Previous hip conditions such as Legg-Calves-Perthes disease, avascular necrosis and prior surgical intervention	NR	Microfracture Chondroplasty	Repair Reconstruction Debridement	Femoral osteoplasty Acetabuloplasty	Release Repair Partial capsulotomy	Lig teres debridement Subchondral cyst removal Iliopsoas release Removal of loose body Trochanteric bursectomy Central acetabular decompression
	Group 2			NR	Chondroplasty	Repair Reconstruction Debridement	Femoral osteoplasty Acetabuloplasty	Release Repair	Lig teres debridement Subchondral cyst removal Iliopsoas release Removal of loose body Trochanteric bursectomy Glut med/min repair ITB release Piriformis release Sciatic neurolysis
Lodhia et al. (2016)	Arthroscopic Central Acetabular Decompression: Clinical Outcomes at Minimum 2-Year Follow-up Using a Matched-Pair Analysis	CAO (central acetabular osteophytes) requiring arthroscopic CAD and notchplasty during surgery for a labral tear and/or femoroacetabular impingement Minimum 2-year follow-up	Revision surgeries, Tönnis grade 2 and higher, Previous hip conditions such as Legg-Calves-Perthes disease, avascular necrosis, Prior surgical intervention	Articular cartilage damage Labral tear Central acetabular osteophytes	Microfracture Chondroplasty	NR	Femoral osteoplasty Acetabuloplasty	NR	Lig teres treatment Subchondral cyst removal Iliopsoas release ITB release Trochanteric bursectomy Glut med/ min repair Piriformis release Sciatic neurolysis Removal of loose body CAD/Notchplasty
	Group 2			Articular cartilage damage Labral tear	Microfracture Chondroplasty	NR	Femoral osteoplasty Acetabuloplasty	NR	Lig teres treatment Subchondral cyst removal Iliopsoas release ITB release Trochanteric bursectomy Glut med/ min repair Piriformis release Sciatic neurolysis Removal of loose body
Lund et al. (2017)	Danish Hip Arthroscopy Registry (DHAR): the outcome of patients with femoroacetabular impingement (FAI)	Operated for symptomatic FAI from January 2012 until November 2015.	Diseases other than FAI (including developmental hip dysplasia or Legg-Calve-Perthes, periacetabular osteotomy; THA) Previous surgery in related hip Incomplete data registrations.	Pincer deformity Cam deformity Mixed cam pincer Articular cartilage damage Labral tear synovitis Ligamentum teres injury Os acetabuli	Debridement Microfracture Resection	Reinsertion Resection Reconstruction	Femoral osteochondroplasty Acetabular rim trim	NR	Lig teres debridement Lig teres repair Synovectomy
Mansell et al. (2018)	Arthroscopic Surgery or Physical Therapy for Patients With Femoroacetabular Impingement Syndrome: A Randomized Controlled Trial With 2-Year Follow-up	Age 18 and 60 years, Seeking care at Madigan Army Attended Medical Center between April 2013 and July 2014. Met clinical criteria for FAIS &/or labral pathology Surgical candidates Combination of all the following physical examination findings: Patient self-report of pain in the anterior hip or groin; Pain reproduced with passive or active flexion; Positive FADIR (Flexion Adduction Internal Rotat…	Joint space narrowing <2 mm. Other concurrent systemic disease (cancer, rheumatoid arthritis or systemic arthralgia/arthritis) Pending litigation/workmen’s compensation Moving or relocating within the following 6 months Reproductoin of hip symptoms with lumbar spine testing Pregnancy History of prior surgery on the same hip Formal course of physical therapy within the past 6 months Unable to give…	NR	NR	Repair Debridement	Femoral osteoplasty Acetabular osteoplasty	NR	NR
Más Martínez et al. (2014)	Hip arthroscopy in males younger than 40 with femoroacetabular impingement: Short-term outcomes	Patients registered on prospective database since 2009 Age under 40 years, Male gender High-intensity sports physical activity, Diagnosis of FAI (Cam, Pincer or mixed type) Tönnis stage 0---2. Minimum postoperative follow-up period of 12 months	Hip dysplasia Legg-Calve-Perthes disease, Prior hip surgery Age under 18 years.	Pincer deformity Cam deformity Labral tear Chondral lesions Impingement of iliopsoas tendon	Debridement Microfracture	Stabilisation Resection	NR	NR	Tenotomy of iliopsoas tendon
Michal et al. (2018)	Subspinal impingement: clinical outcomes of arthroscopic decompression with one year minimum follow up	All patients who underwent subspinal arthroscopic decompression of low AIIS, by a single surgeon, between 2012 and 2014. > 18 years of age Clinical manifestation of hip impingement.	<18 years of age at the time of surgery Previous hip surgery, Degenerative changes of the joint: Tönnis grade equal or greater than 2 Developmental dysplasia of the hip, Previous slipped capital femoral epiphysis	Pincer deformity Cam deformity Articular cartilage damage Labral tear	NR	Repair	Femoral osteoplasty Acetabular osteoplasty Subspinal decompression	NR	NR
Nawabi et al. (2016)	Outcomes After Arthroscopic Treatment of Femoroacetabular Impingement for Patients With Borderline Hip Dysplasia	Primary hip arthroscopy for femoroacetabular impingement between March 2009 and July 2012 Boarderline dysplasia	NR	NR	Chondroplasty	Repair Debridement	Femoral osteoplasty Acetabular osteoplasty	Closure Shift	Lig teres debridement
	Group 2			Chondroplasty	Repair Debridement	Femoral osteoplasty Acetabular osteoplasty		Closure Shift	Lig teres debridement
Newman et al. (2016)	Revision Hip Arthroscopy: A Matched-Cohort Study Comparing Revision to Primary Arthroscopy Patients	Revision hip arthroscopic surgery at a single facility by a single surgeon from March 2005 to April 2013 Aged between 19 and 50 years No prior open hip surgery, Agreed to participate in the study. Each patient in the revision cohort was matched by year of surgery with 2 patients undergoing primary hip arthroscopic surgery during the same time period		NR	Microfracture	Repair Reconstruction Debridement	Femoral neck osteoplasty Acetabular rim trim	NR	NR
	Group 2			NR	Microfracture	Repair Reconstruction Debridement	Femoral neck osteoplasty Acetabular rim trim	NR	Removal of adhesions
Nwachukwu et al. (2017)	Defining the “Substantial Clinical Benefit” After Arthroscopic Treatment of Femoroacetabular Impingement	Patients with FAI treated with arthroscopic labral surgery, acetabular rim trimming, femoral osteochondroplasty, and capsular repair between April 1, 2010 and October 15, 2014	Patients undergoing revision hip arthroscopic surgery, bilateral hip arthroscopic surgery, staged contralateral hip arthroscopic surgery within 1 year	NR	NR	NR	Cam decompression Rim decompression	Repair	NR
Ohlin et al (2019)	Good 5-year outcomes after arthroscopic treatment for femoroacetabular impingement syndrome	Arthroscopic surgery for FAI syndrome.	Advanced OA (joint space < 2 mm) Severe dysplasia (lateral centre edge angle ≤ 20 degrees). (CI to surgey) Prior hip surgery.	NR	Microfracture	Repair Resection	Femoral osteoplasty Acetabular osteoplasty	NR	Lig teres resection
	Group 2
Ortiz-Declet et al. (2018)	Return to Play Among Golfers Undergoing Hip Arthroscopy: Short-to Mid-term Follow-up	Arthroscopy between August 2008 and February 2015. Played golf at a recreational level within 1 year prior to surgery Attempted to return to the sport postoperatively Minimum 2-year postoperative measures for the modified Harris hip score, Nonarthritic Hip Score, Hip Outcome Score–Sports Specific Subscale, and visual analog scale for pain	Ipsilateral prior hip surgeries, Preoperative Tönnis osteoarthritis grade > 1, Previous hip conditions, Workers compensation status	Articular cartilage damage Labral tear Ligamentum teres tear	NR	Repair Debridement Resection	Femoral osteoplasty Acetabular osteoplasty	Release Repair Plication	Lig teres debridement Iliopsoas fractional lengthening
Perets et al. (2018)	Clinical Outcomes and Return to Sport in Competitive Athletes Undergoing Arthroscopic Iliopsoas Fractional Lengthening Compared With a Matched Control Group Without Iliopsoas Fractional Lengthening	Arthroscopic IFL with FAI treatment between November 2009 and April 2014. High school, collegiate, or professional athlete Documented preoperatively PRO scores including the modified Harris Hip Score (mHHS), Non-Arthritic Athletic Hip Score (NAHS), Hip Outcome Score-Sports Specific Subscale (HOS-SSS), and VAS.	<16 years at surgery, Tönnis grade >1, Previous hip conditions such as Legg-Calve-Perthes disease, hip fractures, slipped capital femoral epiphysis, and avascular necrosis of the femoral head, hip dysplasia (lateral center-edge angle <18°), Acetabular microfracture, Trochanteric bursectomy, Gluteus medius repair, Previous ipsilateral hip surgery	NR	NR	Repair Reconstruction Debridement	Femoral osteoplasty Acetabular osteoplasty	Repair	Lig teres debridement Iliopsoas fractional lengthening
				NR	NR	NR	NR	NR	NR
Perets et al. (2017)	Outcomes of Hip Arthroscopy in Competitive Athletes	Athlete at the high school, collegiate, or professional levels preoperatively Underwent arthroscopic capsular plication Preoperatively recorded PRO scores including modified Harris hip score (mHHS), nonarthritic athletic hip score (NAHS), hip outcome score-sports-specific subscale (HOS-SSS), and VAS	<16 years of age, Preoperative Tönnis grade >1, Previous hip conditions such as Legg- Calve-Perthes disease, hip fractures, slipped capital femoral epiphysis, and avascular necrosis of the femoral head, hip dysplasia (lateral center edge angle [LCEA] <18°), Surgical ipsilateral hip intervention	NR	Microfracture	Repair Reconstruction Debridement	Femoral osteoplasty Acetabular osteoplasty	Plication	Lig teres debridement Iliopsoas fractional lengthening
Perets et al. (2018)	Excision of Labral Amorphous Calcification as a Part of Hip Arthroscopy-Clinical Outcomes in a Matched-Controlled Study	Primary hip arthroscopy for FAI and labral tear with subsequent excision of AC deposit involving the anterosuperior labralcapsular recess between October 2008 and July 2014.	Worker’s compensation claims, Legg-Calve-Perthes disease, hip fractures, slipped capital femoral epiphysis, osteonecrosis of the femoral head, Hip dysplasia, Surgical ipsilateral hip intervention, Os acetabuli, Tönnis grade greater than 1.	Articular cartilage damage Labral tear	NR	Repair Debridement	Femoral osteoplasty Acetabular osteoplasty	Release Plication	NR
	Group 2			Articular cartilage damage Labral tear	Microfracture	Repair Debridement	Femoral osteoplasty Acetabular osteoplasty	Release Plication	NR
Perets et al. (2018)	Midterm Outcomes and Return to Sports Among Athletes Undergoing Hip Arthroscopy	Undergoing hip arthroscopy at our institution between February 2009 and November 2011 Athletes at the high school, collegiate, or professional level preoperatively Eligible for 5-year follow-up.	Preoperative Tönnis grade .1, No preoperative PRO scores, Prior hip conditions (ie, Legg-Calve-Perthes disease, slipped capital femoral epiphysis, avascular necrosis of the femoral head, or hip fractures), hip dysplasia (lateral center-edge angle ≤18°), Prior ipsilateral hip surgery	Articular cartilage damage Labral tear Ligamentum teres tear	Microfracture	Repair Reconstruction Debridement	Femoral osteoplasty Acetabular osteoplasty	Release Repair Plication	Iliopsoas fractional lengthening Synovectomy Notchplasty Trochanteric bursectomy Gluteus medius repair
Perets et al. (2018)	Minimum Five-year Outcomes of Hip Arthroscopy for the Treatment of Femoroacetabular Impingement and Labral Tears in Patients with Obesity: A Match-controlled Study	Hip arthroscopy for the treatment of femoroacetabular impingement and labral tears between February 2008 to December 2011 Preoperatively documented patient reported outcome scores, including the modified Harris hip score, Non-Arthritic Hip Score8, Hip Outcome Score Sports- Specific Subscale (HOS-SSS), and visual analog scale (VAS) for pain	Preoperative Tönnis osteoarthritis grade of ≥2 Prior ipsilateral hip surgical procedure, osteonecrosis, or dysplasia.	Articular cartilage damage Labral tear	Microfracture	Repair Debridement	Femoral osteoplasty Acetabular osteoplasty	Release Repair	Lig teres debridement Iliopsoas fractional lengthening Synovectomy Loose body removal Notchplasty
				Articular cartilage damage Labral tear	Microfracture	Repair Reconstruction Debridement	Femoral osteoplasty Acetabular osteoplasty	Release Repair	Lig teres debridement Iliopsoas fractional lengthening Synovectomy Loose body removal Notchplasty
Pergaminelis et al. (2017)	Outcomes of arthroscopic debridement of isolated Ligamentum Teres tears using the iHOT-33	Isolated Ligamentum Teres tear managed with arthroscopic debridement	Concomitant intra-articular hip pathology (femoroacetabular impingement, labral lesions, hip dysplasia) also managed during arthroscopy. Previous hip surgery.	Ligamentum teres tear Synovitis Chondropathy	Chindroplasty	NR	NR	Tightening	Lig teres debridement Synovectomy
Philippon (2009)	Outcomes following hip arthroscopy for femoroacetabular impingement with associated chondrolabral dysfunction Minimum two-year follow-up	Arthroscopic treatment for FAI and chondrolabral dysfunction	Bilateral hip arthroscopy, Avascular necrosis Hips which had undergone previous surgery.	Pincer deformity Cam deformity Articular cartilage damage Labral tear Ligamentum teres tear Loose bodies Synovitis	Debridement Microfracture	Repair Debridement	Femoral osteoplasty Acetabular osteoplasty (rim trim)	NR	Lig teres debridement Lig teres repair
Redmond et al. (2015)	Arthroscopic acetabuloplasty and labral refixation without labral detachment.[Erratum appears in Am J Sports Med. 2015 Feb;43(2):NP1 Note: Vemula, S Pavan [added]]	Acetabuloplasty and labral refixation without detachment, performed in cases with an intact chondrolabral junction	Patients not undergoing acetabuloplasty or revisions Patients with previous hip conditions such as Legg-Calves-Perthes, avascular necrosis, and dysplasia	NR	Microfracture	Labral refixation without labral detachment	Femoral osteoplasty Acetabular osteoplasty	Release Repair Plication	NR
	Group 2			NR	Microfracture	Labral refixation with labral detachment	Femoral osteoplasty Acetabular osteoplasty	Release Repair Plication	NR
Redmond et al. (2015)	Clinical results of hip arthroscopy for labral tears: a comparison between intraoperative platelet-rich plasma and bupivacaine injection	Hip arthroscopy for labral tears between November 2010 through March 2012 Minimum of 2 years’ follow-up.	Revision surgery, Gluteus medius repairs, Labral reconstructions, Workers’ Compensation cases, Advanced arthritis, Previous hip conditions. (avascular necrosis, Perthes disease, connective tissue disorders, pigmented villonodular synovitis, inflammatory arthritis, and synovial chondromatosis)	Articular cartilage damage	Microfracture	Repair Debridement	Femoral osteoplasty Acetabular osteoplasty	Repair	Iliopsoas release
	Group 2			Articular cartilage damage	Microfracture	Repair Debridement	Femoral osteoplasty Acetabular osteoplasty	Repair	Iliopsoas release
Rhee et al. (2018)	Safety Profile and Short-term Outcomes of BST-CarGel as an Adjunct to Microfracture for the Treatment of Chondral Lesions of the Hip	BST-CarGel applied to their hip from November 2014 to July 2016	NR	Cam deformity	Microfracture	Repair Reconstruction	NR	NR	NR
Riff et al. (2018)	High Rate of Return to High-Intensity Interval Training After Arthroscopic Management of Femoroacetabular Impingement Syndrome	Arthroscopic surgery for the treatment of FAIS by a single fellowship-trained surgeon between March 2012 and May 2015 Recreational involvement in a HIIT regimen (including CrossFit, Shred415, or self-directed cross-training including plyometrics) Minimum 2-year follow-up Completion of patient-reported outcome (PRO) measures	Tönnis grade 1, Hip dysplasia (LCEA <20°), History of congenital hip disease, Perthes disease, slipped capital femoral epiphysis, concomitant medical or orthopaedic condition that would compromise return to sport.	Pincer deformity Cam deformity Mixed Cam pincer Articular cartilage damage Labral tear	Chondroplasty Microfracture	Repair	Femoral osteoplasty Acetabular osteoplasty (rim trim)	Closure	Partial synovectomy Psoas release Heterotopic ossification excision Trochanteric bursectomy
Saltzman et al. (2017)	The Influence of Body Mass Index on Outcomes after Hip Arthroscopic Surgery with Capsular Plication for the Treatment of Femoroacetabular Impingement	Primary hip arthroscopic surgery for FAI between January 1, 2012, and January 1, 2014 Limited osteoarthritis (.2 mm of joint space) on plain radiographs Minimum 2-year follow-up with radiographs and patient reported outcome scores Failed non-operative management (minimum 4 weeks of physical therapy)	Revision surgeries, Congenital hip disorders, Prior surgical interventions	NR	Chondroplasty Microfracture	Repair	Femoral osteoplasty Acetabular osteoplasty (rim trim)	Plication	Trochanteric bursectomy
	Group 2			NR	Chondroplasty Microfracture	Repair	Femoral osteoplasty Acetabular osteoplasty (rim trim)	Plication	Trochanteric bursectomy
Sansone et al. (2015)	Good Results After Hip Arthroscopy for Femoroacetabular Impingement in Top-Level Athletes	HSAS activity level 7 or 8 prior to symptom onset Age <40 years.	Undergone hip surgery prior to the index operation	Articular cartilage damage Cam lesion Pincer lesion Others not reported	Microfracture	Repair Resection	Femoral osteoplasty Acetabular osteoplasty	NR	NR
Sansone et al. (2017)	Outcome after hip arthroscopy for femoroacetabular impingement in 289 patients with minimum 2-year follow-up	Arthroscopic surgery for suspected FAI.	Prior surgery Failure to complete 2 year Follow-up Contraindications to surgery: advanced osteoarthritis (OA), with joint space below 2 mm, severe dysplasia	Pincer deformity Cam deformity Articular cartilage damage Labral tear	Microfracture	Suture Resection	Femoral osteoplasty Acetabular osteoplasty	NR	NR
Sawyer et al. (2015)	Clinical Outcomes After Arthroscopic Hip Labral Repair Using Looped Versus Pierced Suture Techniques	Hip arthroscopy for chondrolabral dysfunction (labral and chondral damage associated with impingement) in the setting of femoroacetabular impingement (FAI) between June 2009 and December 2011.	Less than 2 mm of joint space, Did not undergo a labral repair, Underwent labral reconstruction or augmentation, Had avascular necrosis (AVN), Underwent a previous open or arthroscopic hip procedure	Pincer deformity Cam deformity Articular cartilage damage Labral tear	Microfracture	Repair -looped	NR	NR	NR
	Group 2			Pincer deformity Cam deformity Articular cartilage damage Labral tear	Microfracture	Repair -pierced	NR	NR	NR
	Group 3			Pincer deformity Cam deformity Articular cartilage damage Labral tear	Microfracture	Repair -combined	NR	NR	NR
Shaw et al. (2017)	Functional outcomes of hip arthroscopy in an active duty military population utilizing a criterion-based early weight bearing progression	Active-duty personnel undergoing arthroscopic surgery for FAI treated with femoral neck osteochondroplasty, acetabuloplasty, labral repair or debridement, and/or fractional psoas lengthening Received postoperative therapy by a single physical therapist at the treating facility	Not active military personnel or received therapy at another facility	NR	NR	Repair Debridement	Femoral osteoplasty Acetabular osteoplasty	NR	NR
Stake et al. (2013)	Hip Arthroscopy for Labral Tears in Workers’ Compensation: A Matched-Pair Controlled Study	WC status, Minimum 2-year follow-up, Treatment with arthroscopic surgery.	Previous hip conditions such as Legg-Calve-Perthes disease or avascular necrosis	NR	Microfracture Chondroplasty	Repair Debridement	Femoral osteoplasty Acetabular osteoplasty	Release Plication	Lig teres debridement Removal loose body Synovectomy Debridement trochanteric bursitis Excision bone cyst Iliopsoas release
	Group 2			NR	Microfracture Chondroplasty	Repair Debridement	Femoral osteoplasty Acetabular osteoplasty	Release Plication	Lig teres debridement Removal loose body Synovectomy Debridement trochanteric bursitis Excision bone cyst
Stone et al (2019)	Preoperative Predictors of Achieving Clinically Significant Athletic Functional Status After Hip Arthroscopy for Femoroacetabular Impingement at Minimum 2-Year Follow-Up	Hip arthroscopy for FAIS, Self-reporting as an athlete (recreational, high school, college, or professional), Minimum of 2-year follow up.	Not being an athlete, Ipsilateral or contralateral hip surgery, Advanced osteoarthritis, reduced joint space ( Tönnis grade >1), Evidence of congenital hip disorders [e.g., slipped capital femoral epiphysis, developmental dysplasia of the hip (lateral center-edge angle <20° and Perthes disease].	NR	NR	NR	NR	NR	NR
Stone et al (2019)	Comparable patient-reported outcomes in females with or without joint hypermobility after hip arthroscopy and capsular plication for femoroacetabular impingement syndrome	Diagnosis of FAIS Willingness to participate and complete required questionnaires..	<16 years of age or above 50 at the time of surgery, Functional illiteracy, Prior history of paediatric deformities (congenital hip dislocation, slipped capital femoral epiphysis or Perthes disease), Osteoarthritis or joint space narrowing <2mm( Tönnis grade > 0), Hip dysplasia (lateral center edge angle [LCEA] < 20°, Concomitant arthroscopic procedures in addition to FAI correction (i.e gluteus …	NR	NR	NR	NR	NR	NR
	Group 2			NR	NR	NR	NR	NR	NR
Suarez-Ahedo et al. (2017)	Relationship Between Age at Onset of Symptoms and Intraoperative Findings in Hip Arthroscopic Surgery	Underwent hip arthroscopic surgery for any related abnormality between 2008 to 2015 Minimum 2-year follow-up.	Revision arthroscopic surgery, Tönnis grade ≥2, Previous hip conditions (such as Legg-Calves-Perthes disease, avascular necrosis, and prior surgical intervention).	Articular cartilage damage Labral tear Ligamentum teres tear Dysplasia Heterotopic ossification Notch osteophytes Synovitis Trochanteric bursitis Loose bodies Subspine impingement Iliopsoas bursitis Instability Gluteus medius tear	NR	NR	NR	NR	NR
	Group 2			Articular cartilage damage Labral tear Ligamentum teres tear Dysplasia Heterotopic ossification Notch osteophytes Synovitis Trochanteric bursitis Loose bodies Subspine impingement Iliopsoas bursitis Instability Gluteus medius tear	NR	NR	NR	NR	NR
Tahoun et al. (2018)	Arthroscopic repair of acetabular cartilage lesions by chitosan-based scaffold: Clinical evaluation at minimum 2 years follow-up	Attended between May 2013 to July 2015, 18 and 55 years old Clinical diagnosis and radiologic evidence of FAI associated with an acetabular chondral lesion. Full-thickness acetabular cartilage lesion ≥2 cm2 identified at arthroscopy after adequate debridement.	Inflammatory joint disease, Radiologic signs of osteoarthritis (Tӧnnis grade ≥2), Hip dysplasia (lateral center edge angle of Wiberg <25° , acetabular index angle of Tӧnnis >10° )	Cam and Pincer deformity Cam deformity Articular cartilage damage Labral tear	Debridement Microfracture Chitosan-based scaffold	Repair	Femoral osteoplasty Acetabular osteoplasty	NR	NR
Thorborg et al. (2018)	Patient-Reported Outcomes Within the First Year After Hip Arthroscopy and Rehabilitation for Femoroacetabular Impingement and/or Labral Injury: The Difference Between Getting Better and Getting Back to Normal	Consecutive patients with FAI and/or labral injury Hip arthroscopy for the first time, performed by the same surgeon Complaints and clinical symptoms of intra-articular hip joint abnormality and FAI morphology.	A joint space width of 2 mm or less was considered pathological in terms of osteoarthritis and patients were therefore not eligible for hip arthroscopy	NR	Microfracture	Repair	Femoral osteoplasty Acetabular rim trim	NR	Psoas tenotomy
	Group 2			NA	NA	NA	NA	NA	NA
Tijssen et al. (2016)	A clinical observational study on patient-reported outcomes, hip functional performance and return to sports activities in hip arthroscopy patients	Hip arthroscopy between January 2010 and April 2014 by same surgeon (EV) at Rijnstate Finished a standardized rehabilitation protocol at Sports Medical Center Papendal at least six months before start of study Between 18 and 65 years of age at time of surgery	Current injuries of the operated or non-operated hip/leg or spine Indications of intra-articular hip joint pathology in the non-operated hip General balance impairments Not able to read/understand Dutch language	NR	NR	Fixation Resection	Femoral osteoplasty Acetabular osteoplasty (‘FAI’)	NR	NR
	Group 2
Ukwuani et al (2019)	Return to Dance and Predictors of Outcome After Hip Arthroscopy for Femoroacetabular Impingement Syndrome	Symptomatic FAIS, Failure of nonsurgical management Primary dance participation prior to surgery.	Retired dancers, Symptomatic contralateral hip requiring surgery, History of trauma or rheumatologic disease, History of paediatric deformities (developmental dysplasia of the hip, slipped capital femoral epiphysis, and Perthes disease) Osteoarthritis or any joint space narrowing (Tönnis grade > 1), History of bilateral hip surgery, ipsilateral knee and ankle injuries or surgery within the postop…	Pincer deformity Cam deformity Articular cartilage damage Labral tear	NR	Repair Debridement	NR	NR	NR
Vap et al. (2018)	Outcomes of Arthroscopic Management of Trochanteric Bursitis in Patients With Femoroacetabular Impingement: A Comparison of Two Matched Patient Groups	Diagnosed with FAI and chronic trochanteric bursitis, Undergone a hip arthroscopy for FAI with labral repair and femoral and/or acetabular osteoplasty concomitant ITB lengthening and arthroscopic bursectomy between February 2008 and November 2013. Cam, pincer, and mixed-type FAI diagnoses all included.	Prior arthroscopic or open hip surgery, Magnetic resonance imaging (MRI) confirmed gluteus medius or minimus tears, Concomitant diagnosis of spinal stenosis, spondylosis, or radiculopathy	Pincer deformity Cam deformity Mixed cam/pincer Labral tear Trochanteric bursistis	NR	NR	Femoral osteoplasty Acetabular osteoplasty	NR	Trochanteric bursectomy ITB lengthening (Endoscopic)
	Group 2			Pincer deformity Cam deformity Mixed cam/pincer Labral tear	NR	NR	Femoral osteoplasty Acetabular osteoplasty	NR	NR
Waterman et al. (2018)	Return to Golf After Arthroscopic Management of Femoroacetabular Impingement Syndrome	All consecutive patients who underwent hip arthroscopy for the surgical treatment for FAIS between January 1, 2012, and April 17, 2014. Reported golfing in their clinical history 2-year minimum clinical follow-up duration after hip arthroscopic surgery.	Rheumatologic disease, dysplasia, prior history of pediatric deformities (congenital hip dislocation, slipped capital femoral epiphysis, or Perthes disease), osteoarthritis, or any joint space narrowing (Tönnis grade >1).	NR	Microfracture	Repair Debridement	Femoral osteoplasty Acetabular osteoplasty (rim trim)	Repair	Synovectomy Loose body removal
Weber et al. (2017)	Amateur and Recreational Athletes Return to Sport at a High Rate Following Hip Arthroscopy for Femoroacetabular Impingement	Surgery between January 2012 and May 2013 Age 14 to 40 years, Clinical and radiographic diagnosis of symptomatic FAI Failure of conservative management (including physical therapy, activity modification, and oral anti-inflammatories) Participation in sports Minimum of 2-year follow-up after hip arthroscopy.	History of rheumatologic disease, osteoarthritis, or any joint narrowing (Tönnis grade >0); Revision hip arthroscopy; Prior history of chronic pain; and/or interim lower extremity surgery such as knee or ankle surgery.	NR	Debridement	Repair	Femoral osteochondroplasty Acetabular osteoplasty (rim trim)	Closure	NR
	Group 2			NR	Debridement	Repair	Femoral osteochondroplasty Acetabular osteoplasty (rim trim)	Closure	NR
Wu et al. (2016)	Effect of centre-edge angle on clinical and quality of life outcomes after arthroscopic acetabular labral debridement	Hip arthroscopic labral debridement for labral lesion between January 2007 and September 2011 Indications for arthroscopic labral debridement included persistent groin pain with failed non-operative treatment, such as the use of antiinflammatory medications, physical therapy or activity modification for more than six months, with or without associated mechanical symptoms (catching, clicking) Evid…	Severe dysplasia (CE angle<15°), Radiographic evidence of arthritis (Tönnis grade 2 or greater), Legg- Calvé-Perthes disease, Previous hip surgery, Previous hip trauma, Hips with avascular necrosis, pigmented villonodular synovitis and synovial chondromatosis. Labral lesion associated with pincer-type or combined FAI	NR	Chondroplasty	Debridement	Femoral osteoplasty	NR	Lig teres debridement
	Group 2			NR	Chondroplasty	Debridement	Femoral osteoplasty	NR	Lig teres debridement
Yoo et al. (2018)	Outcomes of Hip Arthroscopy in a Military Population Are Similar to Those in the Civilian Population: Matched Paired Analysis at 2 Years	Radiographic and intraoperative findings, consistent with pincer-type or combined pincer and cam-type FAI Minimum 2-year follow-up.	Revision surgery, Tönnis grade >1, Previous hip conditions like acetabular dysplasia, Legg-Calvé-Perthes disease, avascular necrosis Prior surgical intervention	Pincer deformity Cam deformity Mixed Labral tear Subspine impingement	NR	Repair	Femoral osteoplasty Acetabular osteoplasty	NR	Synovectomy ITB release Ilopsoas release Removal of loose body
	Group 2			Pincer deformity Cam deformity Mixed Labral tear Subspine impingement	NR	Repair	Femoral osteoplasty Acetabular osteoplasty	NR	Synovectomy ITB release Ilopsoas release Removal of loose body
Zimmerer et al. (2017)	Return to work after arthroscopic surgery for femoroacetabular impingement in patients younger than 30 years	Older than 17 years and younger than 30 years Arthroscopic treatment of (cam-, pincer- or combined) femoroacetabular Impingement.	Previous hip surgery, Dysplasia Extraarticular pathologies, History of pediatric deformities Osteoarthritis (Tönnis grade >0)	NR	Microfracture Chondroplasty	Repair Debridement	Femoral osteoplasty Acetabular osteoplasty	NR	NR
	Group 2			NR	Microfracture Chondroplasty	Repair Debridement	Femoral osteoplasty Acetabular osteoplasty	NR	NR
	Group 3			NR	Microfracture Chondroplasty	Repair Debridement	Femoral osteoplasty Acetabular osteoplasty	NR	NR
Abbreviations	FAI/S=femoroactetabular impingement/syndrome; LCEA=Lateral centre edge angle; PRO=patient reported outcomes; WC=workers compensation; LBR=labral base repair; CS=circumferential suture; CAD=central acetabular decompression; VAS=visual anologue scale; IFL=ilopsoas fractional lenghtening; ITB=iliotibial band; Lig=Ligamentum; NR=Not reported
